# Supplementary material for: Comparisons of commonly used front-line regimens on survival outcomes in patients aged 70 years and older with acute myeloid leukemia
Source: PubMed Central journal article supplement — Haematologica. 2019 May 9;105(2):398–406. doi: 10.3324/haematol.2018.208637 (PMC7012500; doi:10.3324/haematol.2018.208637), 2020-02
Supplement: 2018.208637.TALATI_SUPPL.pdf [file 2018.208637.TALATI_SUPPL.pdf]

## Comparisons of commonly used front-line regimens on survival outcomes in patients aged 70 years and older with acute myeloid leukemia

Chetasi Talati,<sup>1</sup> Varun C Dhulipala,<sup>2</sup> Martine Extermann,<sup>3,4</sup> Najla Al Ali,<sup>1</sup> Jongphil Kim,<sup>2,5</sup> Rami Komrokji,<sup>1,6</sup> Kendra Sweet,<sup>1,6</sup> Andrew Kuykendall,<sup>1,2</sup> Marina Sehovic,<sup>1</sup> Tea Reljic,<sup>2</sup> Benjamin Djulbegovic,<sup>1,2</sup> and Jeffrey E. Lancet<sup>1,6</sup>

<sup>1</sup>H. Lee Moffitt Cancer Center and Research Institute, Tampa, FL; <sup>2</sup>Maury Regional Cancer Center, Columbia, TN; <sup>3</sup>Senior Adult Oncology Program, H. Lee Moffitt Cancer Center and Research Institute, Tampa, FL; <sup>4</sup>Department of Oncology Sciences, University of South Florida, Tampa, FL; <sup>5</sup>Department of Biostatistics and Bioinformatics, Moffitt Cancer Center, Tampa, FL and <sup>6</sup>Malignant Hematology Department, H Lee Moffitt Cancer Center and Research Institute, Tampa, FL, USA

©2020 Ferrata Storti Foundation. This is an open-access paper. doi:10.3324/haematol.2018.208637

Received: October 9, 2018.

Accepted: May 7, 2019.

Pre-published: May 9, 2019.

Correspondence: *CHETASI TALATI* - chetasi.talati@gmail.com

---

**Supplementary Table S1. Univariate and multivariate analyses and comparison of hypomethylating and intensive chemotherapy cohorts with the propensity score method**

| Clinical Parameter                                  |            | P Value   | Univariate Analysis |        |       | P Value   | Multivariate Analysis |        |       |
|-----------------------------------------------------|------------|-----------|---------------------|--------|-------|-----------|-----------------------|--------|-------|
|                                                     |            |           | HR                  | 95% CI |       |           | HR                    | 95% CI |       |
|                                                     |            |           |                     | Lower  | Upper |           |                       | Lower  | Upper |
| Sex                                                 | Male       | Reference |                     |        |       |           |                       |        |       |
|                                                     | Female     | .73       | 1.04                | 0.85   | 1.26  |           |                       |        |       |
| Race/ethnicity                                      | White      | Reference |                     |        |       |           |                       |        |       |
|                                                     | Other      | .89       | 0.98                | 0.70   | 1.37  |           |                       |        |       |
| Prior hematologic disease                           | No         | Reference |                     |        |       | Reference |                       |        |       |
|                                                     | Yes        | <.0001    | 1.51                | 1.25   | 1.83  | <.0001    | 1.53                  | 1.26   | 1.85  |
| Clinical trial as frontline therapy                 | No         | Reference |                     |        |       |           |                       |        |       |
|                                                     | Yes        | .10       | 1.25                | 0.96   | 1.63  |           |                       |        |       |
| Frontline therapy                                   | HMA        | Reference |                     |        |       | Reference |                       |        |       |
|                                                     | HI therapy | .002      | 1.32                | 1.11   | 1.58  | 0.011     | 1.29                  | 1.06   | 1.56  |
| CCI                                                 | 0-2        | Reference |                     |        |       | Reference |                       |        |       |
|                                                     | ≥ 3        | .066      | 1.27                | 0.98   | 1.63  | 0.044     | 1.30                  | 1.01   | 1.68  |
| Bone marrow blast % at diagnosis (per 10% increase) |            | .08       | 1.04                | 0.99   | 1.09  | 0.048     | 1.05                  | 1.00   | 1.10  |

Patients were stratified equally into 4 groups based on the propensity score, and the stratified Cox post hoc regression was conducted. Because there was some missing data for karyotype and ECOG performance status, only 522 patients were included in this analysis.

**Abbreviations:** CCI, Charlson comorbidity index; CI, confidence interval; HI, high intensity; HMA, hypomethylating agent; HR, hazard ratio; LI, low intensity

**Supplementary Table S2. Demographics and clinicopathologic characteristics of patients treated after 2005.**

| Clinical Parameter                   | All Patients<br>(n=658) | HMA<br>(n=224)     | HI Therapy<br>(n=219) | LI Therapy<br>(n=52) | Supportive<br>Care (n=163) | p-value |
|--------------------------------------|-------------------------|--------------------|-----------------------|----------------------|----------------------------|---------|
| Median Age (range)                   | 75.5 (70 - 95.7)        | 76.3 (70.1 - 91.9) | 73.5 (70 - 86.1)      | 77.8 (71.2 - 90.4)   | 78.4 (70 - 95.7)           | <.0001  |
| Sex                                  |                         |                    |                       |                      |                            | 0.40    |
| Male                                 | 432 (65.7%)             | 142 (63.4%)        | 153 (69.9%)           | 35 (67.3%)           | 102 (62.6%)                |         |
| Female                               | 226 (34.3%)             | 82 (36.6%)         | 66 (30.1%)            | 17 (32.7%)           | 61 (37.4%)                 |         |
| Race/Ethnicity                       |                         |                    |                       |                      |                            | 0.68    |
| Others                               | 49 (7.4%)               | 19 (8.5%)          | 15 (6.8%)             | 2 (3.8%)             | 13 (8%)                    |         |
| White                                | 609 (92.6%)             | 205 (91.5%)        | 204 (93.2%)           | 50 (96.2%)           | 150 (92%)                  |         |
| Type of AML                          |                         |                    |                       |                      |                            | 0.001   |
| De novo                              | 342 (52%)               | 122 (54.5%)        | 132 (60.3%)           | 20 (38.5%)           | 68 (41.7%)                 |         |
| Secondary                            | 316 (48%)               | 102 (45.5%)        | 87 (39.7%)            | 32 (61.5%)           | 95 (58.3%)                 |         |
| Prior Hematology disease             | 266 (40.4%)             | 80 (35.7%)         | 72 (32.9%)            | 30 (57.7%)           | 84 (51.5%)                 |         |
| ECOG PS (n=646)                      |                         |                    |                       |                      |                            | <.0001  |
| 0 or 1                               | 521 (79.2%)             | 186 (83%)          | 185 (84.5%)           | 45 (86.5%)           | 105 (64.4%)                |         |
| 2 - 4                                | 125 (19%)               | 37 (16.5%)         | 26 (11.9%)            | 7 (13.5%)            | 55 (33.7%)                 |         |
| Median WBC, ×10 <sup>9</sup> /L      | 3.5 (0.2 - 230.7)       | 2.6 (0.2 - 147.8)  | 6.4 (0.5 - 230.7)     | 3.2 (0.8 - 215.3)    | 3.8 (0.6 - 215.7)          | <.0001  |
| Median platelet, ×10 <sup>9</sup> /L | 58 (1 - 996)            | 73.5 (1 - 743)     | 56 (6 - 996)          | 63 (2 - 274)         | 42 (4 - 333)               | 0.0001  |
| Median hemoglobin, g/dL              | 9.4 (4.8 - 15.2)        | 9.5 (5.4 - 15.2)   | 9.4 (4.9 - 14)        | 9.6 (6.9 - 13.7)     | 9.4 (4.8 - 14.7)           | 0.1588  |
| Median PB blasts, %                  | 14 (1 - 99)             | 10 (1 - 93)        | 21 (1 - 98)           | 10 (1 - 99)          | 14 (1 - 96)                | 0.004   |
| Median BM blasts, %                  | 36 (2 - 98)             | 30 (4 - 94)        | 48.5 (2 - 98)         | 38 (15 - 88)         | 32 (20 - 94)               | <.0001  |
| Karyotype (n=592)                    |                         |                    |                       |                      |                            | <.0001  |
| Adverse                              | 206 (31.3%)             | 77 (34.4%)         | 47 (21.5%)            | 18 (34.6%)           | 64 (39.3%)                 |         |
| Diploid/Intermediate                 | 373 (56.7%)             | 126 (56.3%)        | 148 (67.6%)           | 30 (57.7%)           | 69 (42.3%)                 |         |
| Favorable                            | 13 (2%)                 | 3 (1.3%)           | 9 (4.1%)              | 0 (0%)               | 1 (0.6%)                   |         |
| FLT3-ITD mutation (n=263 tested)     | 34 (12.9%)              | 10 (9.6%)          | 22 (20%)              | 0 (0%)               | 2 (5.1%)                   | 0.023   |
| NPM1 mutation (n = 257 tested)       | 35 (13.6%)              | 10 (9.7%)          | 20 (19%)              | 1 (9.1%)             | 4 (10.5%)                  | 0.22    |

**Abbreviations:** AML, acute myeloid leukemia; BM, bone marrow; ECOG PS, Eastern Cooperative Oncology Group performance status; HI, high intensity; HMA, hypomethylating agent; LI, low intensity; PB, peripheral blood; WBC, white blood cell

**Supplemental Figure S1**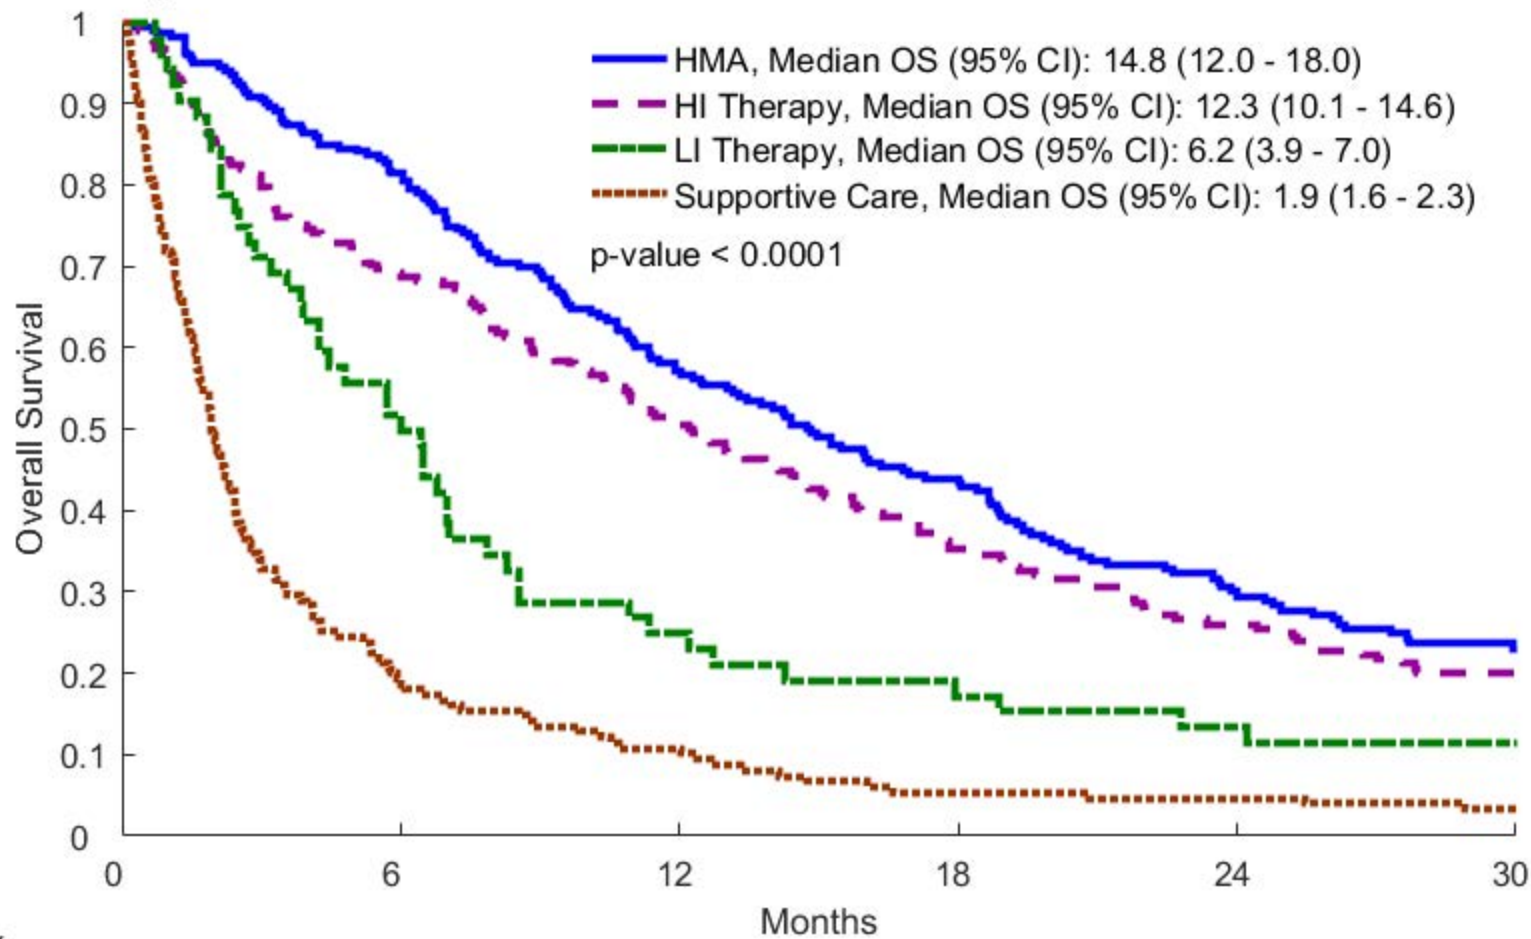**No. at Risk**

|                 |     |     |     |    |    |    |
|-----------------|-----|-----|-----|----|----|----|
| HMA             | 224 | 179 | 120 | 84 | 54 | 39 |
| HI Therapy      | 219 | 149 | 108 | 74 | 50 | 36 |
| LI Therapy      | 52  | 26  | 13  | 9  | 7  | 6  |
| Supportive Care | 163 | 29  | 16  | 8  | 7  | 5  |

Supplementary Figure Legend

**Figure S1. Overall survival among various frontline therapies for acute myeloid leukemia in patients  $\geq$  70 years old treated after 2005.**

**Abbreviations:** AML, acute myeloid leukemia; CI, confidence interval; HI, high intensity; HMA, hypomethylating agent; LI, low intensity; OS, overall survival
