# Supplementary material for: Comparisons of commonly used front-line regimens on survival outcomes in patients aged 70 years and older with acute myeloid leukemia
Source: PubMed Central journal article supplement — Haematologica. 2019 May 9;105(2):398–406. doi: 10.3324/haematol.2018.208637 (PMC7012500; doi:10.3324/haematol.2018.208637), 2020-02
Supplement: 2018_208637-Disclosures_and_Contributions.pdf [file 2018_208637-Disclosures_and_Contributions.pdf]

Haematologica  
HAEMATOL/2018/208637  
Version 4

Comparisons of commonly used frontline regimens on survival outcomes in patients age 70 years and older with acute myeloid leukemia

Chetasi Talati, Varun C Dhulipala, Martine Extermann, Najla Al Ali, Jongphil Kim, Rami Komrokji, Kendra Sweet, Andrew Kuykendall, Marina Sehovic, Tea Reljic, Benjamin Djulbegovic, and Jeffrey E Lancet

Disclosures: none

Contributions: Chetasi Talati, Varun C Dhulipala, Martine Extermann, and Jeffrey Lancet wrote the manuscript. Martine Extermann, Benjamin Djulbegovic and Jeffrey E Lancet designed the study and were involved in final editing of the manuscript. Najla Al Ali collected the clinical data. Jongphil Kim and Marina Sehovic were involved in statistical analysis. Tea Reljic, Andrew Kuykendall, Kendra Sweet, and Rami Komrokji reviewed the manuscript and were involved in editing the manuscript.
