# Supplementary material for: Comparisons of commonly used front-line regimens on survival outcomes in patients aged 70 years and older with acute myeloid leukemia
Source: PubMed Central journal article supplement — Haematologica. 2019 May 9;105(2):398–406. doi: 10.3324/haematol.2018.208637 (PMC7012500; doi:10.3324/haematol.2018.208637), 2020-02
Supplement: HAEMATOL-2018-208637v4-Talati-01.pdf [file HAEMATOL-2018-208637v4-Talati-01.pdf]

# Comparison between treatment options in patients over the age of 70 years with AML

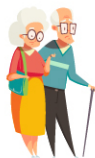

## Cohort

**980** Acute myeloid leukemia (AML) patients; median age 75.6 (70-95.7) years

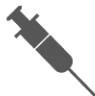

## Treatment options

|                                                                                          |             |
|------------------------------------------------------------------------------------------|-------------|
| <b>1 - High-intensity</b> (daunorubicin/cytarabine or equivalent)                        | 360 (36.7%) |
| <b>2 - Hypomethylating agent (HMA)</b>                                                   | 255 (26.0%) |
| <b>3 - Low-intensity</b> (low-dose cytarabine or similar without hypomethylating agents) | 91 (9.3%)   |
| <b>4 - Supportive care therapy</b> (including hydroxyurea)                               | 274 (28.0%) |

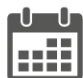

Median follow-up 25 months  
Median overall survival of the entire cohort 7.1 months

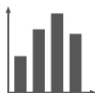

## Results

Median overall survival

|                                    |                    |
|------------------------------------|--------------------|
| <b>1 - High-intensity</b>          | 10.8 months        |
| <b>2 - HMA</b>                     | <b>14.4 months</b> |
| <b>3 - Low-intensity</b>           | 5.9 months         |
| <b>4 - Supportive care therapy</b> | 2.1 months         |

A significant survival benefit using  
frontline HMA

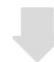

HR = 1.35, 95% CI, 1.10-1.65; P = .004

HR = 2.01, 95% CI, 1.53-2.62; P < .0001

HR = 2.94, 95% CI, 2.39-3.61; P < .0001
